# Supplementary material for: MLKL Deficiency Attenuated Hepatocyte Oxidative DNA Damage by Activating Mitophagy to Suppress Macrophage cGAS-STING Signaling During Liver Ischemia and Reperfusion Injury.
Source: Research Square preprint supplement (doi:10.21203/rs.3.rs-2116689/v1), 2022-10-13
Supplement: Supplementary file 1 [file 22e9e7fe9f7a7e49e6f585a3.docx]

**

Fig1A: MLKL**

**

 Fig1A: GAPDH**

**Fig2B: TBK1 Fig2B: GAPDH**







**Fig2B: cGAS Fig2B: PTBK1**







**Fig3D: GAPDH**





**Fig3D: cGAS Fig3D: P-TBK1**








**Fig3D: TBK1 Fig5B: LC3B**







**Fig5B: GAPDH Fig5B: P62**







**Fig5C: TOM20 Fig5C: PINK1**







**Fig6G: TBK1 Fig6G: GAPDH**







**Fig6G: cGAS**

**Fig6G: PTBK1**
